# Supplementary material for: Satellite DNA-like repeats are dispersed throughout the genome of the Pacific oyster Crassostrea gigas carried by Helentron non-autonomous mobile elements
Source: PubMed Central journal article supplement (PMC7492417; doi:10.1038/s41598-020-71886-y), 2020-09-15
Supplement: 41598_2020_71886_MOESM1_ESM.pdf [file 41598_2020_71886_MOESM1_ESM.pdf]

## Supplementary Information for:

**Satellite DNA-like repeats are dispersed throughout the genome of the Pacific oyster *Crassostrea gigas* carried by *Helentron* non-autonomous mobile elements**

Tanja Vojvoda Zeljko, Martina Pavlek, Nevenka Meštrović, and Miroslav Plohl\*

Division of Molecular Biology, Ruđer Bošković Institute, Zagreb, Croatia

\*Corresponding author:

Miroslav Plohl (plohl@irb.hr; Ruđer Bošković Institute, Bijenička 54, 10 000 Zagreb, Croatia; tel: +385 1 4564 083; fax: +385 1 4561 177)

This file includes Supplementary Figures S1 - S3 and Supplementary Tables S2 - S5.

## SUPPLEMENTARY FIGURES

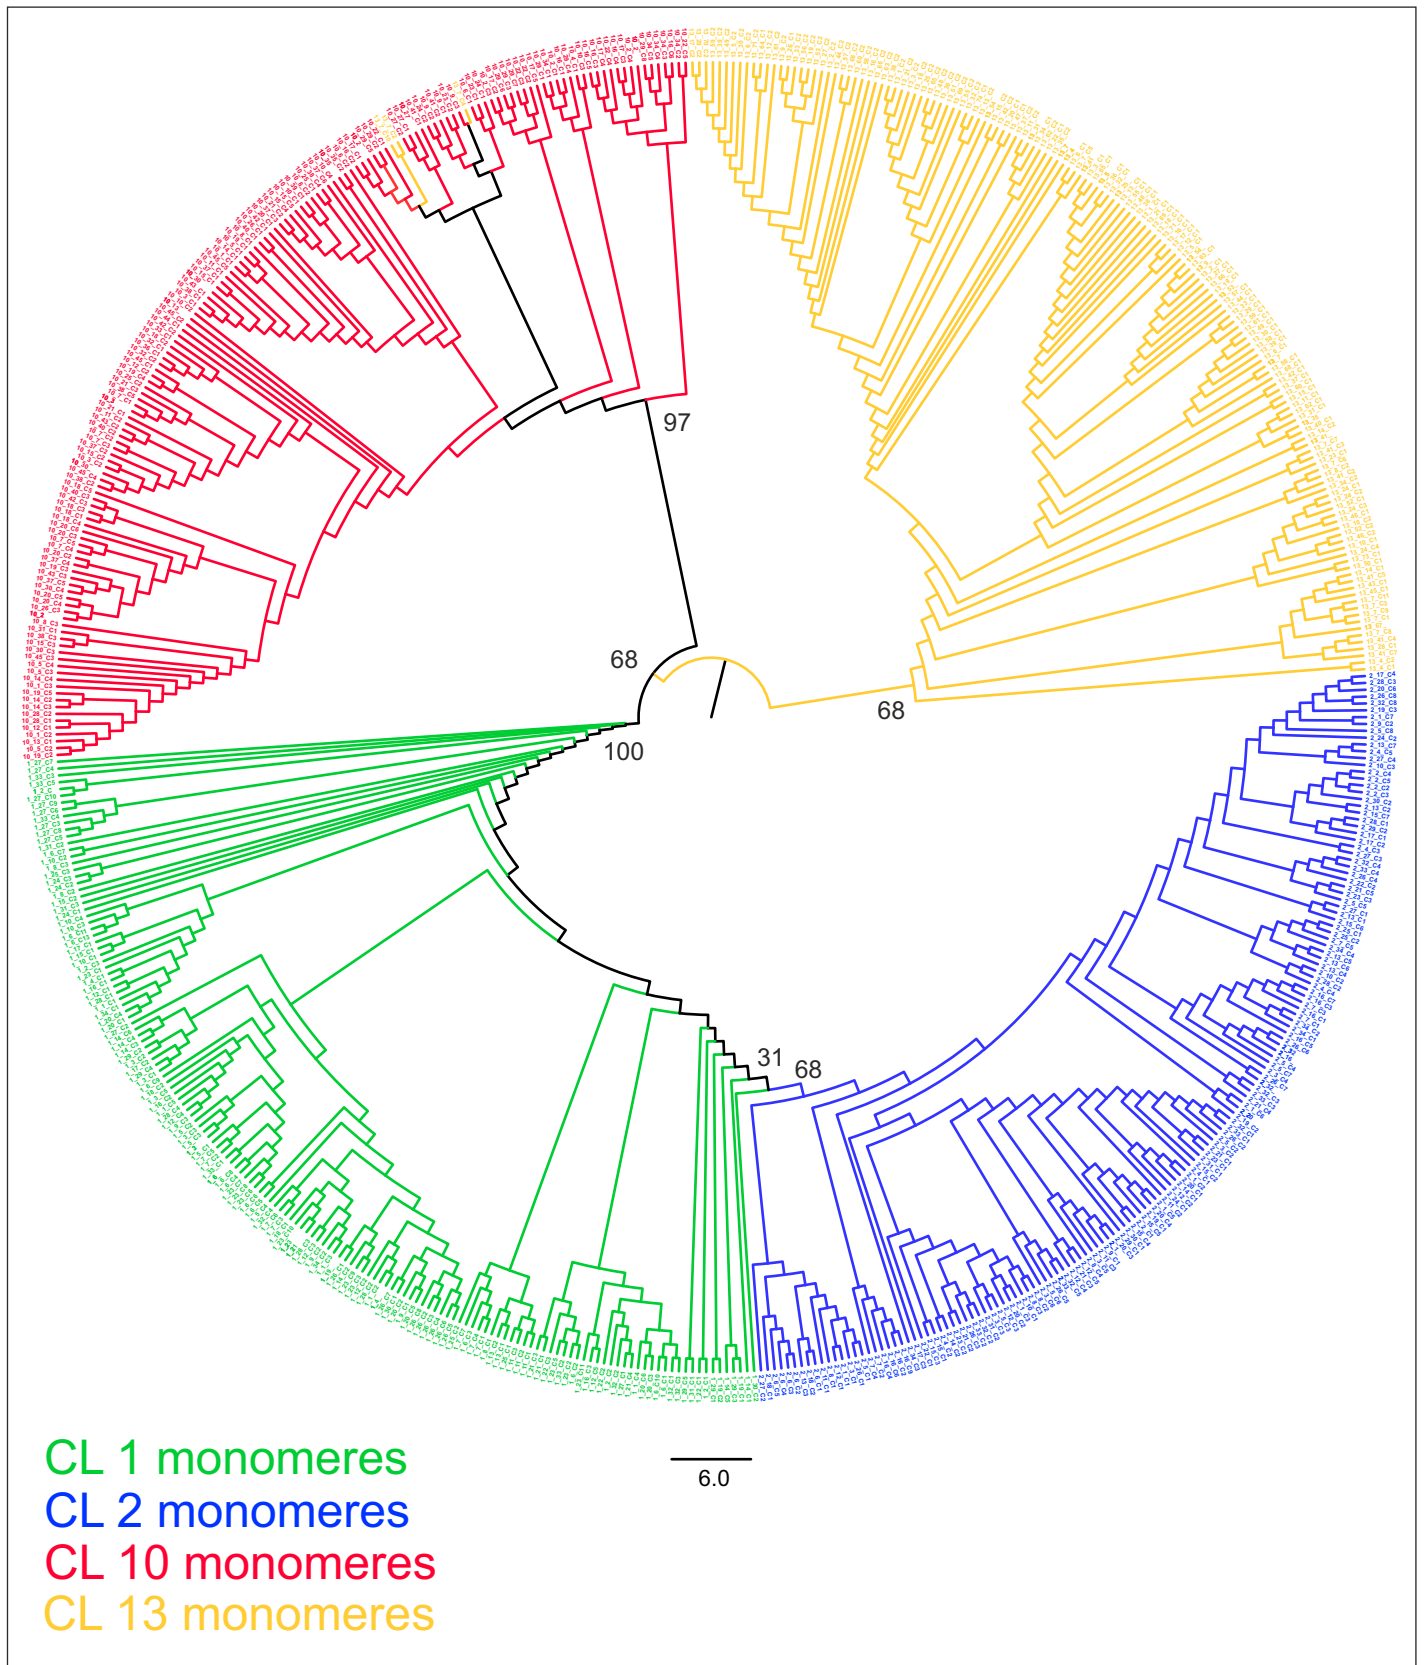

**Supplementary Figure S1.** Phylogenetic relationships of monomers in four clusters of related *Cg\_HINE* central TRs. Shown is maximum-likelihood dendrogram based on nucleotide sequences belonging to monomers from clusters CL1, CL2, CL10 and CL13. Only branch support for the nodes separating main clades are shown.

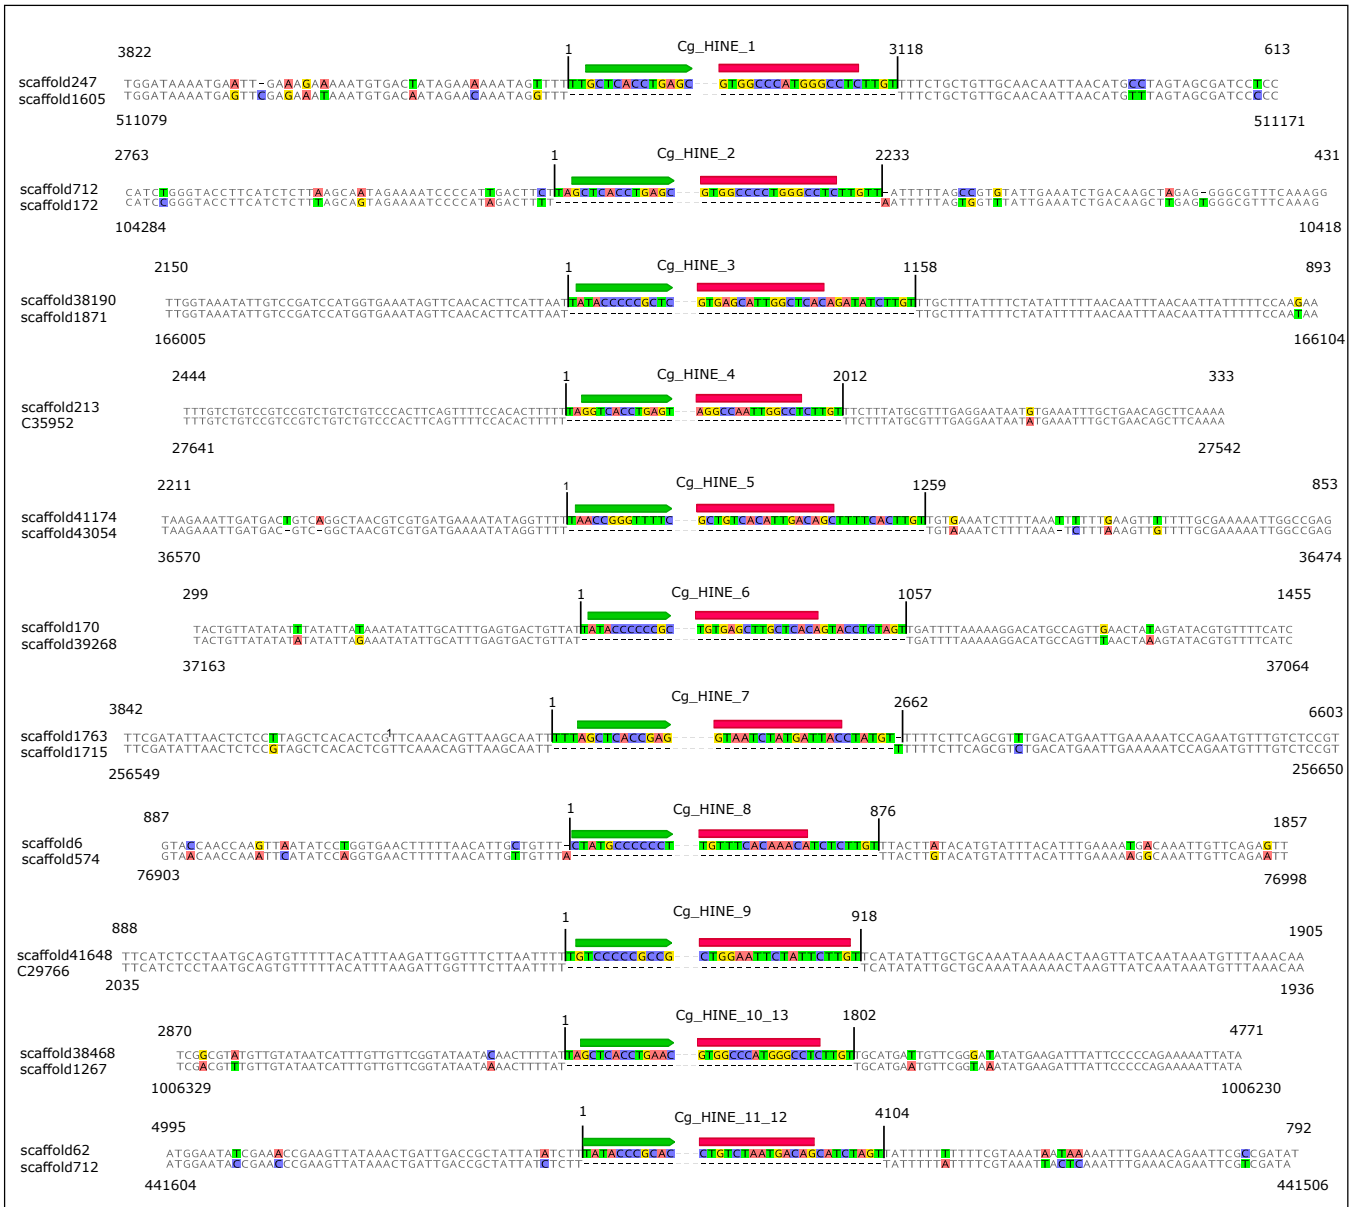

**Supplementary Figure S2.** Empty site analysis of 11 *Cg\_HINE* elements. Chimeric constructs were made using 50 bp upstream and downstream from the determined *Cg\_HINE* element ends and used as queries in a homology search through the *C. gigas* genome assembly. Only one representative result for each empty site is shown. In each alignment, upper sequence is query (with excluded *Cg\_HINE* element insertion site presented in the figure), while lower is genomic scaffold with the relevant hit. Nucleotide positions are marked as in the genome assembly. For each query sequence, the exact *Cg\_HINE* element position is presented, and its length is marked above the black lines marking the insertion sites. Only the 5' beginning of the element (including the subTIR part, green arrows) and the 3' end sequence (including the stem-loop structure, red lines) of a particular *Cg\_HINE* element are shown.

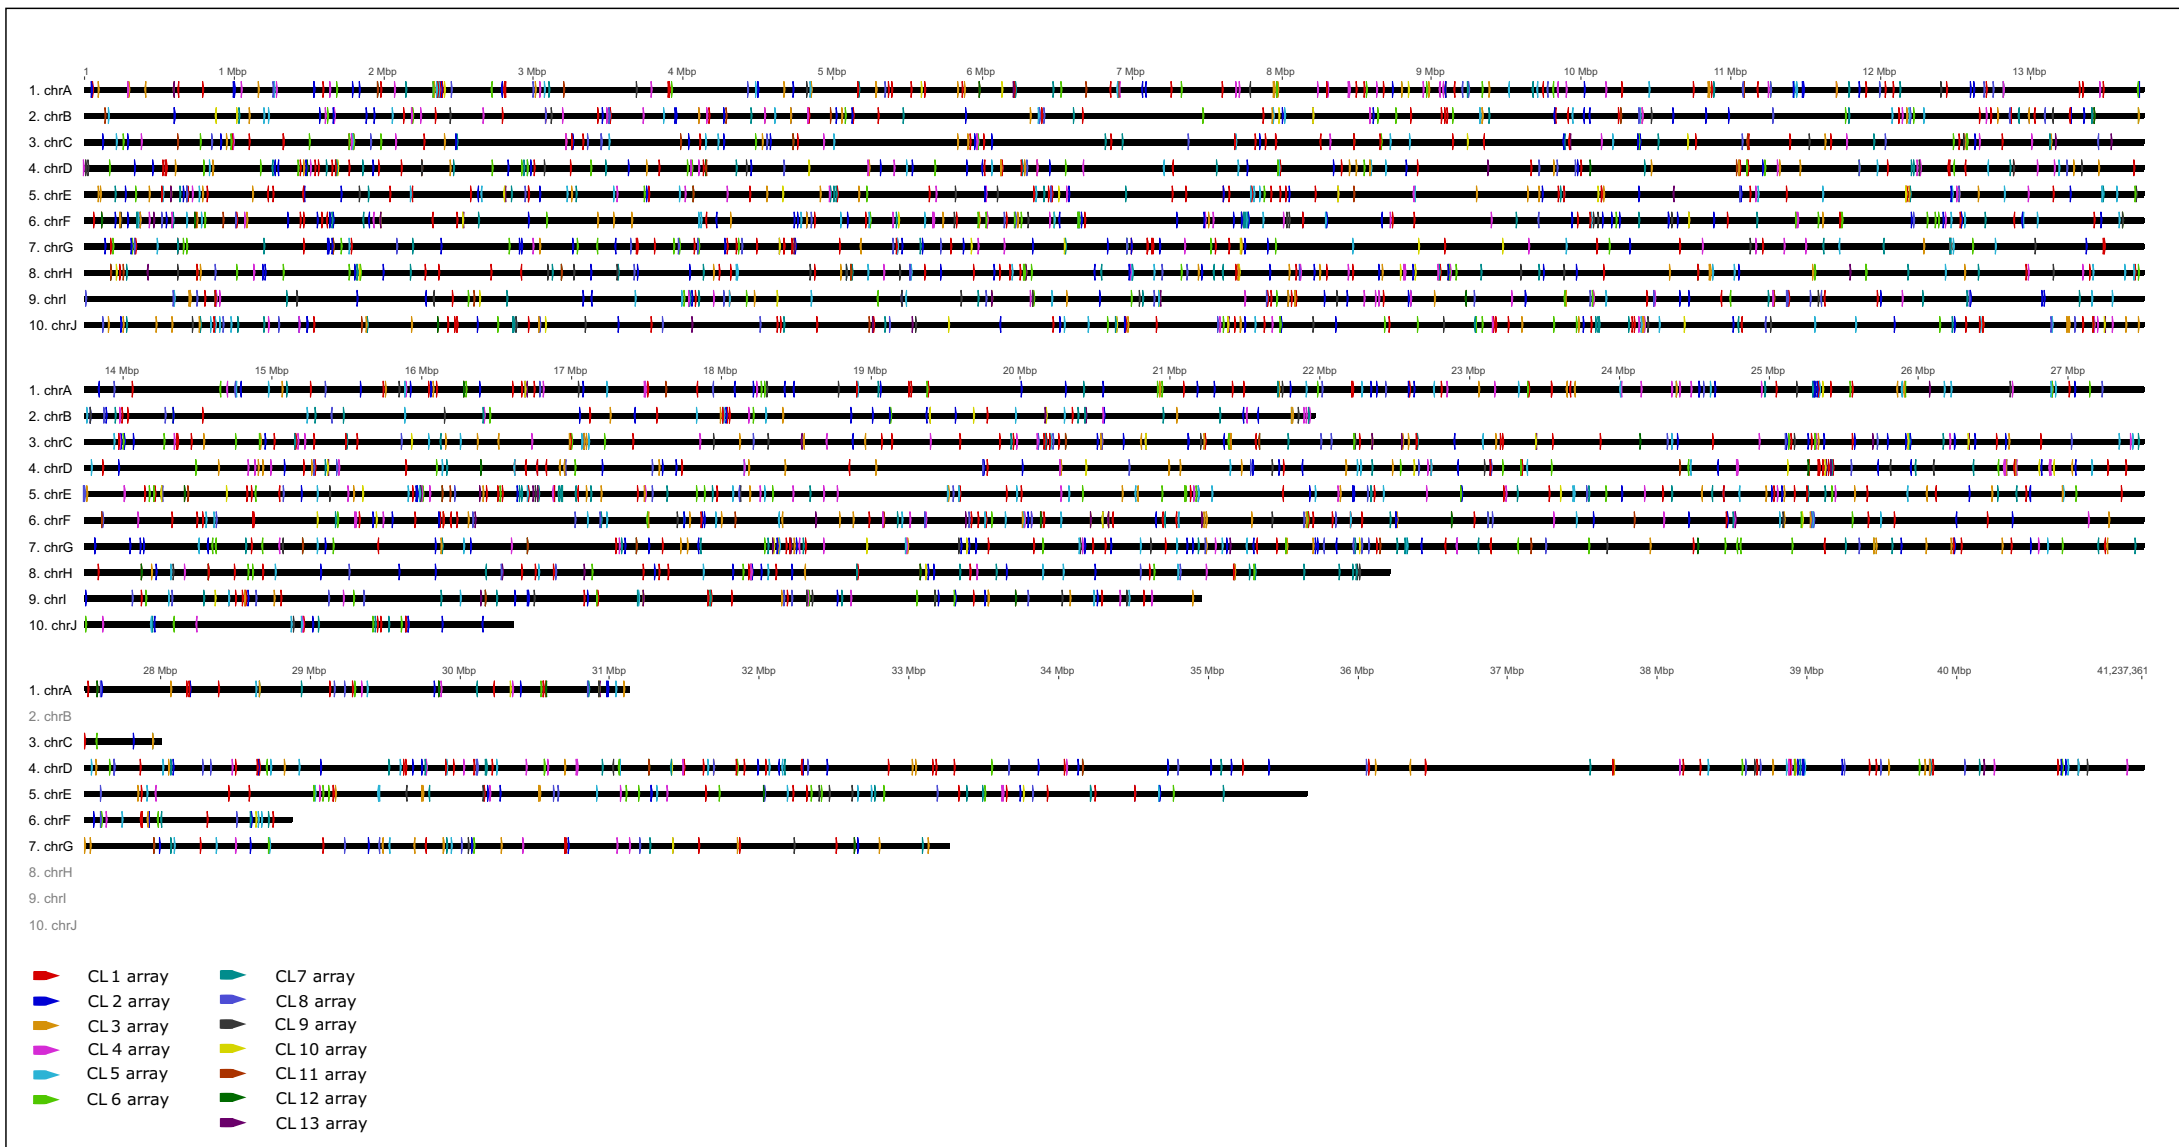

**Supplementary Figure S3.** Arrays from clusters CL1-13 mapped onto *C. gigas* pseudochromosomes. Arrangement of arrays is presented as an approximation of distribution of *Cg\_HINE* elements. For this, a local database of CL1-13 arrays was used to map 100% identical sequences on the *C. gigas* pseudochromosomes<sup>51</sup>.



**Supplementary Table S3.** Identity matrix of related satDNA-like repeats detected in this work and monomers of related “classical” satDNAs.

|                      | Cg170_s<br>at_Cons | HindIII_s<br>at_Cons | CL1_Cons<br>Rep_rev | CL2_Cons<br>Rep_rev | CL10_Con<br>sRep_rev | CL13_Con<br>sRep_rev | CL4_Co<br>nsRep |
|----------------------|--------------------|----------------------|---------------------|---------------------|----------------------|----------------------|-----------------|
| Cg170_sat<br>_Cons   |                    | 94.28%               | 93.71%              | 92.17%              | 66.67%               | 65.77%               | 50.29%          |
| HindIII_s<br>at_Cons |                    |                      | 92.51%              | 90.06%              | 69.94%               | 66.96%               | 52.65%          |
| CL1_Cons<br>Rep_rev  |                    |                      |                     | 89.82%              | 67.86%               | 65.48%               | 51.76%          |
| CL2_Cons<br>Rep_rev  |                    |                      |                     |                     | 68.26%               | 66.07%               | 47.65%          |
| CL10_Con<br>sRep_rev |                    |                      |                     |                     |                      | 70.41%               | 47.95%          |
| CL13_Con<br>sRep_rev |                    |                      |                     |                     |                      |                      | 45.88%          |
| CL4_Cons<br>Rep      |                    |                      |                     |                     |                      |                      |                 |

**Supplementary Table S4.** Similarity of *Cg\_HINE* modules with sequences deposited in Repbase. Consensus sequences of monomers („\_Cons\_Rep”) and consensus sequences of left and right flanking regions („\_Cons\_LF”; „\_Cons\_RF”) from clusters CL1-13 were separately queried through Repbase using CENSOR tool to align them against a reference collection of repeats. Base pairs which denote the exact beginning and end of a particular mobile element are shown in red. Similarity in the last column is calculated as  $Sim = \text{match\_count} / (\text{alignment\_length} - \text{query\_gap\_length} - \text{subject\_gap\_length} + \text{gap\_count})$ .

| Query name   | From | To  | Repbase library<br>sequence name | From | To   | Repeat<br>class/subclass | Similarity<br>between<br>query and<br>Repbase<br>repeat<br>fragment |
|--------------|------|-----|----------------------------------|------|------|--------------------------|---------------------------------------------------------------------|
| CL1_Cons_LF  | 1    | 105 | Helitron-N2_CGi                  | 1    | 105  | DNA/Helitron             | 0.9524                                                              |
| CL1_Cons_RF  | 1    | 60  | Helitron-N2_CGi                  | 2251 | 2310 | DNA/Helitron             | 1.0000                                                              |
| CL1_Cons_Rep | 1    | 167 | Helitron-N55_CGi                 | 1013 | 847  | DNA/Helitron             | 1.0000                                                              |
| CL2_Cons_LF  | 1    | 88  | Helitron-N2d_CGi                 | 1    | 91   | DNA/Helitron             | 0.9888                                                              |
| CL2_Cons_RF  | 1    | 100 | Helitron-N2d_CGi                 | 2320 | 2419 | DNA/Helitron             | 1.0000                                                              |
| CL2_Cons_Rep | 1    | 166 | SAT-1_CGi                        | 323  | 157  | Simple/Sat/SAT           | 0.9940                                                              |
| CL3_Cons_LF  | 1    | 50  | Helitron-N16_CGi                 | 1    | 50   | DNA/Helitron             | 1.0000                                                              |
| CL3_Cons_RF  | 1    | 58  | Helitron-N16_CGi                 | 1400 | 1457 | DNA/Helitron             | 1.0000                                                              |
| CL3_Cons_Rep | 2    | 167 | Helitron-N25_CGi                 | 443  | 608  | DNA/Helitron             | 0.9940                                                              |
| CL4_Cons_LF  | 1    | 55  | Helitron-N2e_CGi                 | 1    | 55   | DNA/Helitron             | 1.0000                                                              |
| CL4_Cons_RF  | 1    | 60  | Helitron-N2e_CGi                 | 1461 | 1521 | DNA/Helitron             | 0.9672                                                              |

|               |   |     |                   |      |      |              |        |
|---------------|---|-----|-------------------|------|------|--------------|--------|
| CL4_Cons_Rep  | 3 | 170 | Helitron-N2e_CGi  | 454  | 621  | DNA/Helitron | 0.9881 |
| CL5_Cons_LF   | 1 | 66  | Helitron-N45_CGi  | 1    | 70   | DNA/Helitron | 0.9851 |
| CL5_Cons_RF   | 1 | 60  | Helitron-N45_CGi  | 841  | 900  | DNA/Helitron | 0.9833 |
| CL5_Cons_Rep  | 1 | 181 | Helitron-N45_CGi  | 760  | 580  | DNA/Helitron | 0.9834 |
| CL6_Cons_LF   | 1 | 77  | Helitron-27_CGi   | 1    | 77   | DNA/Helitron | 0.9870 |
| CL6_Cons_RF   | 1 | 60  | Helitron-N18_CGi  | 970  | 1029 | DNA/Helitron | 1.0000 |
| CL6_Cons_Rep  | 2 | 147 | Helitron-N18_CGi  | 486  | 341  | DNA/Helitron | 0.9932 |
| CL7_Cons_LF   | 1 | 50  | DNA4-4B_CGi       | 1392 | 1441 | DNA          | 0.9400 |
| CL7_Cons_RF   | 1 | 60  | DNA4-4_CGi        | 3641 | 3700 | DNA          | 0.9667 |
| CL7_Cons_Rep  | 2 | 178 | Helitron-N12_CGi  | 572  | 748  | DNA/Helitron | 0.9435 |
| CL8_Cons_LF   | 1 | 63  | Helitron-N9_CGi   | 1    | 63   | DNA/Helitron | 1.0000 |
| CL8_Cons_RF   | 1 | 49  | Helitron-N9_CGi   | 897  | 946  | DNA/Helitron | 0.9800 |
| CL8_Cons_Rep  | 2 | 162 | Helitron-N9_CGi   | 395  | 555  | DNA/Helitron | 1.0000 |
| CL9_Cons_LF   | 1 | 80  | Helitron-N23_CGi  | 1    | 76   | DNA/Helitron | 0.9744 |
| CL9_Cons_RF   | 1 | 56  | Helitron-N23_CGi  | 884  | 939  | DNA/Helitron | 1.0000 |
| CL9_Cons_Rep  | 2 | 173 | Helitron-N23_CGi  | 689  | 518  | DNA/Helitron | 1.0000 |
| CL10_Cons_LF  | 1 | 91  | Helitron-N2C_CGi  | 1    | 91   | DNA/Helitron | 0.9890 |
| CL10_Cons_RF  | 1 | 60  | Helitron-N2C_CGi  | 2574 | 2633 | DNA/Helitron | 1.0000 |
| CL10_Cons_Rep | 2 | 167 | Helitron-N2C_CGi  | 513  | 348  | DNA/Helitron | 1.0000 |
| CL11_Cons_LF  | 1 | 82  | Helitron-N17B_CGi | 1    | 82   | DNA/Helitron | 0.9756 |
| CL11_Cons_RF  | 1 | 60  | Helitron-N17_CGi  | 4390 | 4449 | DNA/Helitron | 1.0000 |
| CL11_Cons_Rep | 1 | 162 | Helitron-N17_CGi  | 618  | 781  | DNA/Helitron | 0.9755 |
| CL12_Cons_LF  | 1 | 82  | Helitron-N17B_CGi | 1    | 82   | DNA/Helitron | 0.9756 |
| CL12_Cons_RF  | 1 | 60  | Helitron-N17_CGi  | 4390 | 4449 | DNA/Helitron | 1.0000 |
| CL12_Cons_Rep | 2 | 138 | Helitron-N17_CGi  | 1180 | 1046 | DNA/Helitron | 0.9416 |
| CL13_Cons_LF  | 1 | 93  | Helitron-N2C_CGi  | 1    | 93   | DNA/Helitron | 0.9785 |
| CL13_Cons_RF  | 1 | 60  | Helitron-N2C_CGi  | 2574 | 2633 | DNA/Helitron | 1.0000 |
| CL13_Cons_Rep | 2 | 168 | Helitron-N37_CGi  | 2616 | 2451 | DNA/Helitron | 0.9048 |

### Supplementary Table S5.

Detected *Crassostrea gigas* genes containing *Cg\_HINE* elements or their deletion derivatives. For each gene, coordinates where similarities were found are listed. For the left (LF) and right (RF) flanking regions similarities (%) to the consensus sequences of the *Cg\_HINE* elements are given. The presence or absence of a specific *Cg\_HINE* part is indicated with + / - signs.

| Gene name<br>(GenBank<br>number) | Gene<br>function                                                                        | Location<br>of<br><i>Cg_HINE</i><br>parts<br>within<br>gene | Left flanking<br>region               | 5'<br>subTIR | 5'<br>IR | 5'<br>microsa<br>tellite                       | Internal<br>tandem repeats                     | Right flanking<br>region           | 3'<br>subTIR | 3'<br>stem-<br>loop |
|----------------------------------|-----------------------------------------------------------------------------------------|-------------------------------------------------------------|---------------------------------------|--------------|----------|------------------------------------------------|------------------------------------------------|------------------------------------|--------------|---------------------|
| Ecsit<br>(gb HQ225835.1)         | Evolutionarily<br>conserved<br>signalling<br>intermediate<br>in <i>Toll</i><br>pathways | 1662 -<br>3169. bp                                          | -                                     | -            | -        | +                                              | 7 repeats (93%<br>similar with<br>CL1_ConsRep) | + (98 % similar<br>to CL1_Cons_RF) | +            | +                   |
| Bindin<br>(gb EU307654.1)        | In<br>fertilization                                                                     | 2401 -<br>4126. bp                                          | + (66%<br>similar to<br>CL4_Cons_LF)) | -            | -        | -                                              | 8.7 repeats (76%<br>similar to<br>CL4_ConsRep) | -                                  | -            | -                   |
|                                  |                                                                                         | 12532 -<br>14723.<br>bp                                     | -                                     | -            | -        | 5.8 repeats (80%<br>similar to<br>CL1_ConsRep) | + (90 % similar<br>to CL1_Cons_RF)             | +                                  | +            |                     |
|                                  |                                                                                         | 19257 -<br>21448.<br>bp                                     | -                                     | -            | -        | 5.8 repeats (81%<br>similar to<br>CL1_ConsRep) | + (90 % similar<br>to CL1_Cons_RF)             | +                                  | +            |                     |
| Bmpr 1<br>(emb AJ577293.1)       | In early<br>embryonic<br>development                                                    | 6952 -<br>9174. bp                                          | + (87%<br>similar to<br>CL1_Cons_LF)  | +            | +        | +                                              | 2 repeats (80%<br>similar to<br>CL1_ConsRep)   | + (77% similar<br>to CL1_Cons_RF)  | +            | +                   |
| Gigasins-2<br>(emb AJ582630.1)   | Defensin-like<br>antimicrobial<br>peptide AMP-<br>Gigasins 2                            | 2180 -<br>2795. bp                                          | + (65%<br>similar to<br>CL6_Cons_LF)  | +            | +        | +                                              | 1.5 repeats (76%<br>similar to<br>CL6_ConsRep) | + (82% similar<br>to CL6_Cons_RF)  | +            | +                   |
